# Supplementary material for: Snow properties at the forest tundra ecotone: predominance of water vapor fluxes even in thick moderately cold snowpacks
Source: Copernicus journal article supplement (doi:10.5194/tc-2022-19), 2022-02-10
Supplement: Supplementary file [file tc-2022-19-RC3-supplement.pdf]

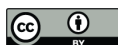

# Snow properties at the forest-tundra ecotone: predominance of water vapor fluxes even in thick moderately cold snowpacks

Georg Lackner<sup>1,2,3,4</sup>, Florent Domine<sup>2,3,5</sup>, Daniel F. Nadeau<sup>1,4</sup>, Matthieu Lafaysse<sup>6</sup>, and Marie Dumont<sup>6</sup>

<sup>1</sup>Department of Civil and Water Engineering, Université Laval, Québec, Canada

<sup>2</sup>Takuvik Joint International Laboratory, Université Laval (Canada) and CNRS-INSU (France), Québec, Canada

<sup>3</sup>Centre d'Études Nordiques, Université Laval, Québec, Canada

<sup>4</sup>CentrEau, Université Laval, Québec, Canada

<sup>5</sup>Department of Chemistry, Université Laval, Québec, Canada

<sup>6</sup>Univ. Grenoble Alpes, Université de Toulouse, Météo-France, CNRS, CNRM, Centre d'Études de la Neige, 38000 Grenoble, France

**Correspondence:** Georg Lackner (georg.lackner@mailbox.org)

## Abstract.

The forest-tundra ecotone is a large circumpolar transition zone between the Arctic tundra and the boreal forest, where snow properties are spatially variable due to changing vegetation. The extent of this biome through all circumpolar regions influences the climate. In the forest-tundra ecotone near Umiujaq in northeastern Canada ( $56^{\circ}33'N$ ,  $76^{\circ}28'W$ ), we contrast the snow properties between two sites, TUNDRA (located in a low-shrub tundra) and FOREST (located in a boreal forest), situated less than 1 km apart. Furthermore, we evaluate the capability of the snow model Crocus, initially developed for alpine snow, to simulate the snow in this subarctic setting. Snow height and density differed considerably between the two sites. At FOREST, snow was about twice as deep as at TUNDRA. The density of snow at FOREST decreased slightly from the ground to the snow surface, in a pattern that is somewhat similar to alpine snow. The opposite was observed at TUNDRA, where the pattern of snow density was typical of the Arctic. Crocus was not able to reproduce the density profiles at either site using its standard configuration. We therefore implemented some modifications for the density of fresh snow, the effect of vegetation on compaction and the lateral transport of snow by wind. We demonstrate that upward water vapor transport is the dominant

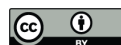

mechanism that shapes the density profile at TUNDRA, while a contribution of compaction due to overburden weight becomes visible at FOREST. The adjustments that were made to Crocus partly compensate for the lack of water vapor transport in the model, but are site-specific ~~to some extent~~. Furthermore, the challenges using Crocus suggest that the general lack of water vapor transport in the snow routines used in climate models leads to an inadequate representation of ~~even~~ thick and moderately cold snowpacks, with possible major impacts on meteorological and climate projections.

## 1 Introduction

Seasonal snowpacks significantly increase surface albedo (Cohen and Rind, 1991) and soil insulation (Meredith et al., 2019) and are thus critical to the planet's surface energy budget. In terms of spatial coverage, most seasonal snowpacks are found in the Arctic tundra and boreal forest biomes, with clear structural differences between the two. In the tundra, snow is usually shallow and has few distinct layers, whereas in the boreal forest, snow is deeper and has a more complex stratigraphy (Royer et al., 2021a). The transition zone between both biomes is called the forest–tundra ecotone, and includes areas of short tundra vegetation alongside forest patches. As snow height depends on the density and height of the vegetation, the resulting snow cover is heterogeneous (Roy-Léveillé et al., 2014). Little is known about the snow structure in the forest–tundra ecotone. Considering its extent throughout circumpolar regions, the considerable changes this ecotone is facing (e.g. rapid greening, see Payette et al. (2001) and Ju and Masek (2016)), and its role in the global climate, more research is essential.

The weather conditions to which Arctic snow is typically exposed differ considerably from conditions in the boreal forest (Sturm et al., 1995; Royer et al., 2021a). During the cold season in the Arctic tundra, very low air temperatures occur together with low precipitation and high wind speeds. The result is a shallow snowpack with strong vertical temperature gradients, particularly in the fall when the ground is not yet frozen. Consequently, the dominant processes that shape the snowpack



structure are the upward transport of water vapor, driven by the high temperature gradient, and the wind-induced compaction of the upper layers. This creates a low-density layer of depth hoar at the bottom and a hard, dense, wind-packed layer at the top (Domine et al., 2015, 2016b). Contrarily, in the boreal forest, air temperatures and precipitation are typically higher, while  
35 wind speeds are lower. Thus, the snowpack is thicker and the vertical temperature gradient is smaller (Royer et al., 2021a). This is particularly true for the boreal forest of northeastern Canada, where precipitation is relatively high compared to Alaska or Siberia (Groisman and Easterling, 1994). In forested environments, the compaction of the lower snow layers due to the weight of the upper layers becomes the dominant process, similar to alpine snow. This results in a snow cover that is spatially complex, where patches of typical Arctic snow blend into patches of alpine-like snow (Morin et al., 2013).

40 Detailed snow models like Crocus (Vionnet et al., 2012) and SNOWPACK (Bartelt and Lehning, 2002; Lehning et al., 2002a,b) have been applied in the Arctic with limited success. Studies using both Crocus (Barrere et al. (2017) and Royer et al. (2021b)) and SNOWPACK (Gouttevin et al., 2018) show that this type of snow is generally not well-modeled, as the simulated density profiles do not match the observations. The lack of consideration of water vapor fluxes is suspected to be one of the main reasons for this (Domine et al., 2019). These models have been developed for alpine applications (Brun et al.,  
45 1989; Bartelt and Lehning, 2002), so the dominant process that controls the density profile in the models is the compaction that results from overburden weight. To overcome this deficiency, Barrere et al. (2017), Gouttevin et al. (2018) and Royer et al. (2021b) all introduced modifications by increasing the maximum density of wind-induced snow compaction and adapting compaction to vegetation characteristics. This considerably improved the simulated density profiles and made them more comparable to observations at the site scale. On the other hand, simulations in the boreal forest have so far focused on the  
50 ~~snow water equivalent~~ (SWE). Studies in Canada (Bartlett et al., 2006; Oreiller et al., 2014) and Eurasia (Brun et al., 2013;

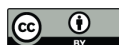

Decharme et al., 2016) showed that the bulk density and the SWE could be simulated reasonably well within the boreal forest.

However, the ability of those models to adequately simulate density profiles has yet to be tested.

Considering the lack of information on the internal physical properties of subarctic snowpacks as well as on the performance of current snow models to accurately simulate these properties, we present snowpit data from two sites in the subarctic region and test the snow model Crocus at both sites. One site was located in a tundra environment and the second one was in a forest nearby. At both sites, we measured profiles of density, thermal conductivity and temperature of the snow. The snow density profiles at both sites were then compared to Crocus simulations to evaluate its performance. Furthermore, we explored adjustments to Crocus similar to those from Barrere et al. (2017) and Royer et al. (2021b) to assess their effectiveness in a subarctic setting.

## 2 Methodology

### 2.1 Study Site

Our study site was located in the Tasiapik valley, near the village of Umiujaq, Quebec, Canada ( $56^{\circ}33'31''\text{N}$ ,  $76^{\circ}28'56''\text{W}$ ), on the eastern shore of Hudson Bay. The valley is 4.5 km long and 1.3 km wide, with elevations ranging from 0 to over 350 m above sea level, and is at the transition between the boreal forest and the Arctic tundra (Figure 1). While the upper part of the valley is dominated by lichen and shrub tundra, the vegetation in the lower part consists of a mixture of forest and high shrubs. The shrubs (mainly dwarf birch *Betula glandulosa*) are between 0.2 m and 1 m tall and cover 70 to 80% of the upper valley. The trees in the lower valley consist of black spruce (*Picea mariana*) up to 5 m tall and are estimated to cover roughly 20% of the surface, while the majority is covered by medium-height shrubs (*Salix spp.* and *Betula glandulosa*) with willows



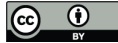

reaching 2-3 m in height. Soils are predominantly sandy (Lemieux et al., 2020). While the soil in the upper part of the valley  
 70 consists almost exclusively of sand (>90%), the sand fraction is lower in forested areas, although no detailed measurements  
 were available. For more details about the study site, see Lackner et al. (2021) and Gagnon et al. (2019).

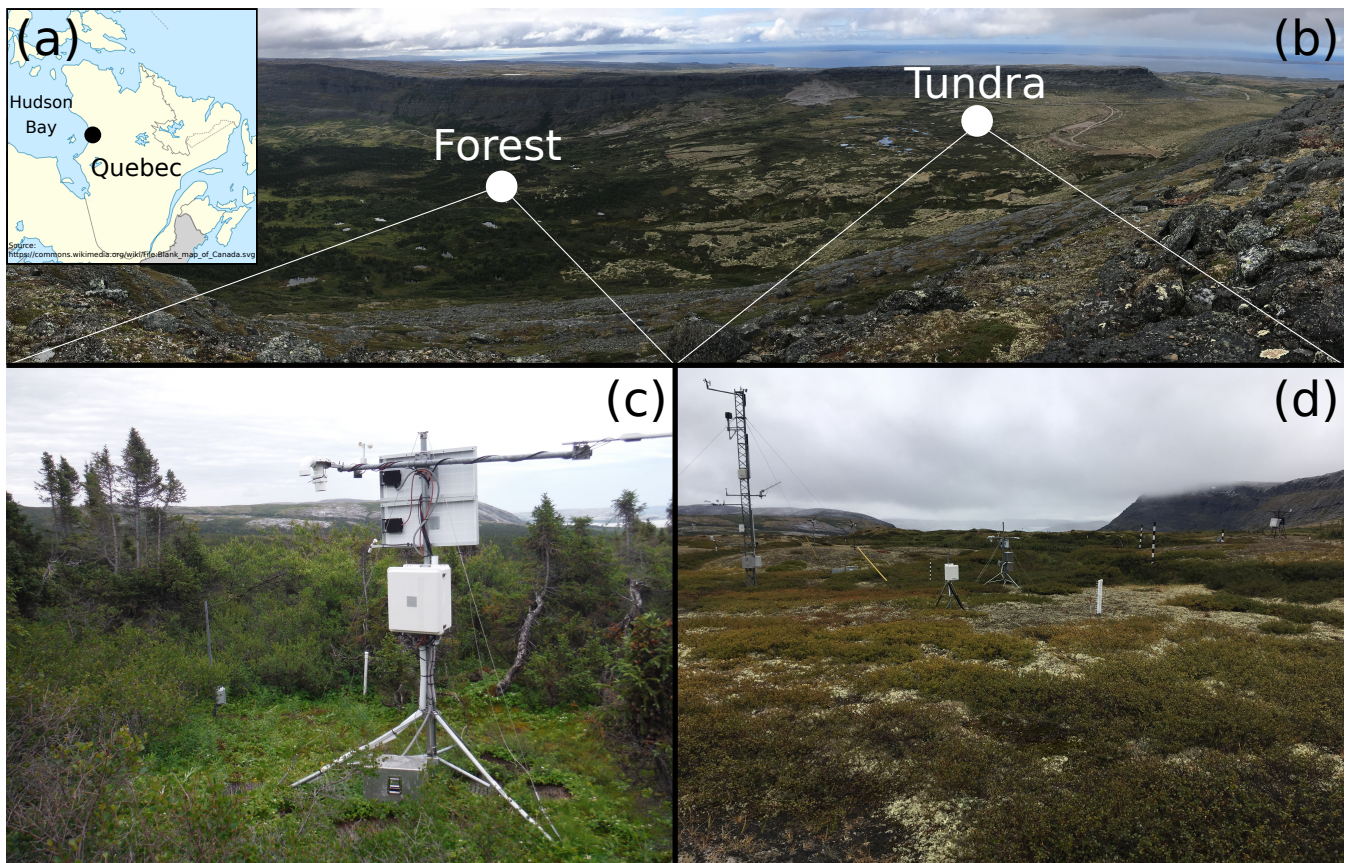

**Figure 1.** (a) Location of the study site on the eastern shore of Hudson Bay, Quebec, Canada. (b) View of the Tasiapik valley towards the south-west, where the bottom (left) is covered with trees and the top (right) with tundra. Note the presence of the cuesta that delimits the valley. (c) FOREST station. (d) TUNDRA station

## 2.2 Instrumental Setup

Two stations were deployed in the valley. One was located in the middle part (FOREST,  $\approx 80$  m above sea level, see Figure 1c) and the other was in the upper part (TUNDRA,  $\approx 140$  m above sea level, see Figure 1d), with a distance of about 900 m



75 between the two. The full radiation budget (CNR4, Kipp and Zonen, The Netherlands), air temperature and relative humidity  
(model HMP45, Vaisala, Finland), wind speed (A100, Vector Instruments, UK), and snow height (SR50, Campbell Scientific,  
USA) were measured at 2.3 m above ground at both sites. Additional measurements of wind speed and direction at a height of  
10 m (model 05103, R.M. Young, USA), specific humidity (IRGASON, Campbell Scientific, USA), and precipitation (T200B,  
Geonor, USA) were also collected at TUNDRA, some 20 m away. Snow temperature and thermal conductivity were measured  
80 at both sites using vertical poles equipped with 5 TP02/TP08 heated needle probes (Hukseflux, The Netherlands). At TUNDRA,  
a second pole held 18 T-type thermocouples and 4 TP08 heated needle probes. The measurement principle of the TP02/TP08  
heated needles is detailed in Morin et al. (2010) and Domine et al. (2015, 2016b). In short, each needle has a heated section and  
an unheated reference thermometer. The temperature of both is recorded when the needle is heated. The temperature difference  
between the two parts is then plotted against the logarithm of the time elapsed since the onset of heating. The effective snow  
85 thermal conductivity  $k_{eff}$  is inversely proportional to the slope of the resulting regression line. According to Domine et al.  
(2016b), the resulting error in the thermal conductivity can be as high as 29%. Lastly, three time-lapse cameras were installed  
at TUNDRA.

Snow field surveys were conducted once or twice a year from 2012 to 2019 at different times throughout the winter (from  
January to April). During each field survey, snow pits were dug at several locations around the two study sites and further away  
90 in a perimeter of several hundred meters encompassing the site, with similar vegetation. A subset of the snow pit data (from  
2012 to 2015) is presented in Domine et al. (2015). For each snow pit, the grain types of the layers were identified and the  
density and temperature profiles were measured. For some snow pits, the thermal conductivity profiles were also measured. A  
portable instrument equipped with a TP02 heated needle was used to measure thermal conductivity and a 100 cm<sup>3</sup> box cutter  
(Conger and McClung, 2009) and a field scale were used to measure the density profiles.

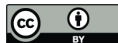

### 95 2.3 ISBA-Crocus Land Surface and Snow Models

Crocus and ISBA (Interaction Sol-Biosphère-Atmosphère) are part of the SURFEX modeling platform version 8.1 (<http://www.umr-cnrm.fr/surfex/>) developed by Météo-France. ISBA (Noilhan and Planton, 1989; Decharme et al., 2011) simulates water and energy exchanges between the atmosphere, the vegetation, and the soil. In the presence of snow, Crocus is activated. Crocus (Vionnet et al., 2012) is a physically-based snow scheme that can distinguish up to 50 snow layers each defined by their thickness, temperature, density, liquid water content, age, and microstructural properties (optical diameter and sphericity). These properties evolve according to physical processes such as thermal conduction, snow metamorphism, and snow compaction.

A first adaption of Crocus to Arctic snow has already been introduced in Vionnet et al. (2012) ~~in order~~ to simulate blowing snow events. Due to the 1D nature of the model, simulating blowing snow is problematic. Two separate processes have been implemented in Crocus to simulate blowing snow, first, sublimation can be increased to simulate the loss of snow, effectively reducing the mass of the snowpack or secondly, the upper layers can be densified, without changing the mass of the snowpack. For the first option, the quantity of sublimating snow is increased due to blowing snow episodes and follows the parametrization of Gordon et al. (2006), with the corresponding mass being subtracted from the snowpack. This option was not activated in our study in order not to artificially increase sublimation rates. For the second option, enabled here, the upper snow layers are compacted according to the following equation

$$\frac{\delta \rho}{\delta t} = \frac{\rho_{max} - \rho}{\tau}. \quad (1)$$

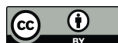

where  $\rho$  is the current density of the upper snow layer,  $\rho_{max}$  is the maximum density (set as  $350 \text{ kg m}^{-3}$ ) and  $\tau$  is a time scale set to 48 h. Here, we raised the maximum value  $\rho_{max}$  to  $600 \text{ kg m}^{-3}$ , as suggested in Barrere et al. (2017) and Royer et al. (2021b) for Arctic applications.

115 Barrere et al. (2017) showed that the default version of Crocus was not capable of correctly simulating density profiles that were observed in Arctic snow. Preliminary simulations at our study site led to the same conclusion. We therefore deemed it relevant to explore modifications to the code that are all based on physical processes specific to the Arctic environment, in order to remedy this shortcoming. We chose to focus on three key processes that were suggested by Barrere et al. (2017), Gouttevin et al. (2018) and Royer et al. (2021b): ~~wind densification~~, particularly the densification of fresh snow (*Snowfall*),  
 120 compaction due to ~~the weight of the snow column above~~ (*Compaction*), and the lateral transport of snow during blowing snow events (*Blowing snow*). Note that our goal here is not to propose an optimal parametrization of these processes, but rather to explore whether their adaptation to the low-Arctic context can improve simulations.

For the first process *Snowfall*, there are three options for fresh snow density in the default version of Crocus (Vionnet et al. (2012), Schmucki et al. (2014) and Anderson (1976)), as detailed in Lafaysse et al. (2017). All three depend on wind speed and  
 125 air temperature (except for the one from Anderson (1976) which depends on temperature only) and lead to rather low densities given the cold temperatures typically found in the Arctic. As in Royer et al. (2021b), we used the parametrization of Vionnet et al. (2012) for the fresh snow density  $\rho_n$

$$\rho_n = \max(50, a_\rho + b_\rho(T_a - T_{fus}) + c_\rho W s^{1/2}), \quad (2)$$

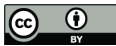

where  $a_p = 109 \text{ kg m}^{-3}$ ,  $b_p = 6 \text{ kg m}^{-3} \text{ K}^{-1}$ , and  $c_p = 26 \text{ kg m}^{-7/2} \text{ s}^{-1/2}$  are parameters and  $T_{fus}$  is the melting point  
 130 of water. Equation 2 is driven by air temperature ( $T_a$ ) and wind speed ( $Ws$ ). Motivated by the fact that the top layers of  
 the snowpack are usually very hard in Arctic environments, we opted to increase the density of fresh snow by doubling the  
 parameter  $a_p$  and multiplying  $c_p$  by 5. These values were obtained with a sensitivity analysis where the density of the upper  
 snow layers served as validation data. Vegetation traps snow and prevents the subsequent transport of snow by wind (Essery  
 and Pomeroy, 2004), thus reducing the effect of wind on the density of fresh snow. We therefore chose to apply this new  
 135 parametrization only when the height of the snowpack exceeds the vegetation height. When that is not the case, the default  
 parameters from Vionnet et al. (2012) are used.

The process *Compaction* makes snow densification dependent on canopy height. This takes into account the stabilizing effect  
 from vegetation and follows observations of Domine et al. (2016a) that density within shrubs is significantly lower than above.  
 In Crocus, snow density  $D$  is updated at each time step  $dt$  to account for compaction. Herein, we introduce a parameter ~~acting~~  
 140 ~~as a factor  $c$  of~~ this increase in density.

$$\frac{dD}{D} = c \frac{-\sigma}{\eta} dt, \quad (3)$$

where  $\sigma$  is the overburden and  $\eta$  is the viscosity. This allows us to modulate the increase in density due to compaction from  
 0% to 100%, where 0% means no increase in density and 100% means that the default procedure is applied. In this study,  
 we selected a fixed value of 0.05, meaning the increase was reduced to 5% of its default value. This value was obtained by  
 145 comparing observed and simulated density profiles. Following observations from Ménard et al. (2014) and Belke-Brea et al.



(2020) highlighting the bending of shrubs under the weight of snow, this reduction in densification due to compaction is applied only for half the height of the canopy.

Lastly, a simple scheme to compensate for the lack of a blowing snow scheme (*Blowing snow*) was implemented in Crocus. High winds are very frequent in the Arctic, particularly during snowfall events, and thus blowing snow is extremely important (Li and Pomeroy, 1997). Due to the 1D nature of the model, it is not able to explicitly take this phenomenon into account. However, ignoring the effects of blowing snow would greatly alter the simulation results. As such, we implemented a linear equation that can modulate actual precipitation during blowing snow events, to account for lateral transport. For offline simulations, as presented here, no implementation of snow erosion or accumulation is available in Crocus. However, as stated earlier, a blowing snow process is already included in Crocus, but there snow is removed by increasing sublimation. We opted for a process that can add or remove snow without changing the sublimation in order to avoid the artificial alteration of this flux, the precipitation rate PR was changed based on wind speed:

$$P_{new} = P_{old}(a + b Ws). \quad (4)$$

In equation 4,  $P_{new}$  is the new precipitation rate,  $P_{old}$  is the old rate,  $Ws$  is the wind speed in  $\text{m s}^{-1}$  and  $a$  and  $b$  are coefficients. We obtained a reasonable agreement between the simulations and observations of the vertical density profiles and snow heights with  $a = 0.1$  and  $b = 0.3$ . To account for the fact that blowing snow does not occur at low wind speeds, this option was only activated for wind speeds greater than  $3 \text{ m s}^{-1}$ . Additionally, for wind speeds higher than  $10 \text{ m s}^{-1}$ , the increase in precipitation was limited to twice the original precipitation rate. Areas with tall vegetation act as sinks for wind-blown snow





(Myers-Smith and Hik, 2013). A preliminary series of tests revealed that it was desirable to use equation 4 for FOREST only, in order to remain as close as possible to the observed snow heights and focus our analysis on the internal properties of the snow cover. Note that equation 4 could also be used to remove precipitation when needed, for instance when simulating highly wind-prone sites.

In summary, we explored various (non-optimized) modifications that target processes known to be poorly managed by Crocus in the Arctic. At TUNDRA, the *Snowfall* and *Compaction* modifications were enabled, while at FOREST, the *Snowfall*, *Compaction*, and *Blowing snow* modifications were all activated.

## 2.4 Forcing Data

The meteorological forcing variables of ISBA-Crocus are typical of a land surface model: air temperature, specific humidity, wind speed, incoming shortwave and longwave radiation, atmospheric pressure, and (solid and liquid) precipitation rates. Observations of these variables at each of the two sites have been collected since 2012, except for atmospheric pressure, which was available since June 2017. ERA5 (Hersbach et al., 2020) data were used for the pressure before 2017 and were adjusted applying a simple regression obtained with data from after 2017 between the measured data and the ERA5 data ( $R^2 = 0.99$  after the adjustment).

The modeled soil columns had a total thickness of 12 m and were divided into 20 layers of increasing depth. Following the soil water content analysis from Lackner et al. (2021), we also adjusted two soil hydraulic parameters, the saturated soil water content and the field capacity. The soil composition was set to 95% sand and 5% silt (Gagnon et al., 2019) for TUNDRA and to 80% sand, 15% silt and 5% clay for FOREST based on estimates. To ensure the equilibrium of soil moisture and temperature, we initialized the model with a spin-up of five years (2012-2017). Note that because observations of precipitation from before



|             | $T_a$ (°C) |     | $W_s$ (m s <sup>-1</sup> ) |     | $SW_{down}$ (W m <sup>-2</sup> ) |      |
|-------------|------------|-----|----------------------------|-----|----------------------------------|------|
|             | mean       | MAD | mean                       | MAD | mean                             | MAD  |
| 2017-18     | 0.5        | 1.1 | 0.8                        | 1.3 | 14.3                             | 14.4 |
| 2018-19     | 0.5        | 1.1 | 1.0                        | 1.5 | 8.3                              | 9.8  |
| 2019-20     | 0.3        | 0.7 | 0.9                        | 1.2 | 4.5*                             | 4.8* |
| all winters | 0.4        | 1.0 | 0.9                        | 1.3 | 9.0                              | 9.6  |

**Table 1.** Mean difference and mean absolute difference MAD of the air temperature  $T_a$ , wind speed  $W_s$  and downwelling shortwave radiation  $SW_{down}$  for three winters 2017-18, 2018-19, and 2019-20. \*Note that the radiation at TUNDRA was replaced with FOREST data for parts of winter 2019-20 (15 December to 1 March) due to problems with the instrument at TUNDRA.

2015 were not available, raw ERA5 data had to be used for the 2012–2015 period. We corrected the precipitation data for undercatch using the transfer function of Kochendorfer et al. (2017). For the partitioning of precipitation into rain and snow, we used a fixed threshold of 0.5°C. The suitability of the threshold was tested using air temperature and observations of the type of precipitation from Environment and Climate Change Canada (<https://climate.weather.gc.ca>, last access: 15 December 2021) at the Umiujaq airport (≈3km away from the TUNDRA).

~~Thus, we~~ used a different forcing data set for each station. Because some of the required variables were not available at FOREST, we used the precipitation, pressure and specific humidity from TUNDRA. Given the proximity of the two sites, the differences between these variables are presumed to be very small.

## 190 3 Results

### 3.1 Observed Meteorological Conditions

Before analyzing the snow characteristics, we compared the meteorological conditions at both sites (Figure 2).

Additionally, in Table 1, the mean difference and the mean absolute difference are shown for winters 2017-18, 2018-19, and 2019-20.



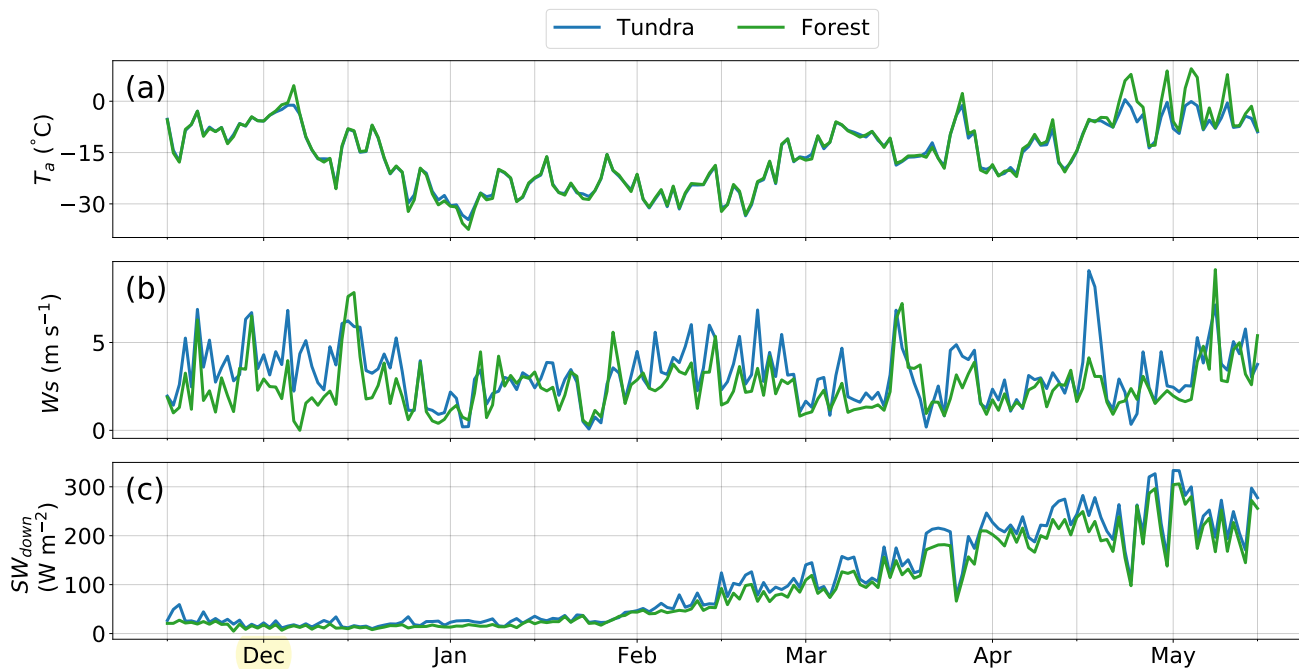

**Figure 2.** Daily mean (a) air temperature  $T_a$ , (b) wind speed  $W_s$  and (c) downwelling shortwave radiation  $SW_{down}$  measured at the two sites TUNDRA and FOREST for winter 2018-19.

195 Air temperatures at the two stations were fairly similar. On average, TUNDRA was  $0.4^{\circ}\text{C}$  colder than FOREST. Only occasional ~~minor~~ differences ( $\lesssim 2^{\circ}\text{C}$ ) occurred until mid-April. After this point, air temperatures at TUNDRA were slightly colder than at FOREST. This trend was observed for all winters, with the exception of winter 2016–17, where the difference was less pronounced. Wind speeds were consistently higher at TUNDRA, with a mean difference of about  $0.9\text{ m s}^{-1}$  for all years. Lastly, the disparity in downwelling shortwave radiation is also minimal, with a mean difference of  $9.0\text{ W m}^{-2}$ . The

200 absolute difference in downwelling shortwave radiation between TUNDRA and FOREST increased in spring from February onward, while the relative difference compared to the magnitude of the fluxes remained comparable throughout winter. The difference likely arises due to the location of FOREST further down the valley, where topographic shading is more significant.



The cumulative solid precipitation for three years is shown in Figure 3. Despite fairly variable interannual amplitudes, the temporal patterns were very similar from one year to the next. In fall, snowfall rates were quite sustained until mid-January, decreased temporarily and then rose again in April.

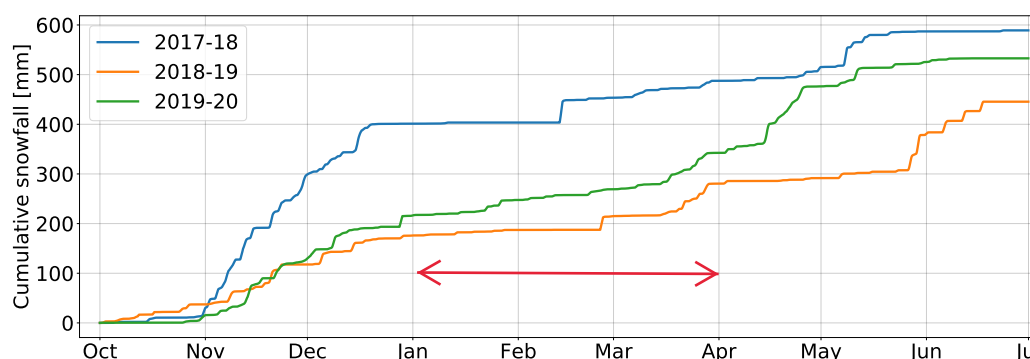

**Figure 3.** Cumulative snowfall for three winters.

## 3.2 Observations of Snow Properties

### 3.2.1 Snow Height

Figure 4 shows the evolution of observed snow height for five consecutive winters (2015–2020) at TUNDRA and for three winters at FOREST.

The onset of a permanent snow cover consistently occurred in the second half of October each year. Also, the snow cover formed at the same time at both sites. However, the subsequent evolution exhibited some differences between the two sites. At TUNDRA, a large fraction of the snow accumulation took place in the first few months of winter, up to mid-January. This was usually followed by a period of low precipitation (see Figure 3) and thus low snow accumulation. Towards the end of winter, an increase in snowfall coincided with peak snow heights, typically in April or early May. At FOREST, the accumulation was more evenly distributed over the entire winter and a gradual increase in snow height until April or early May was observed for

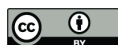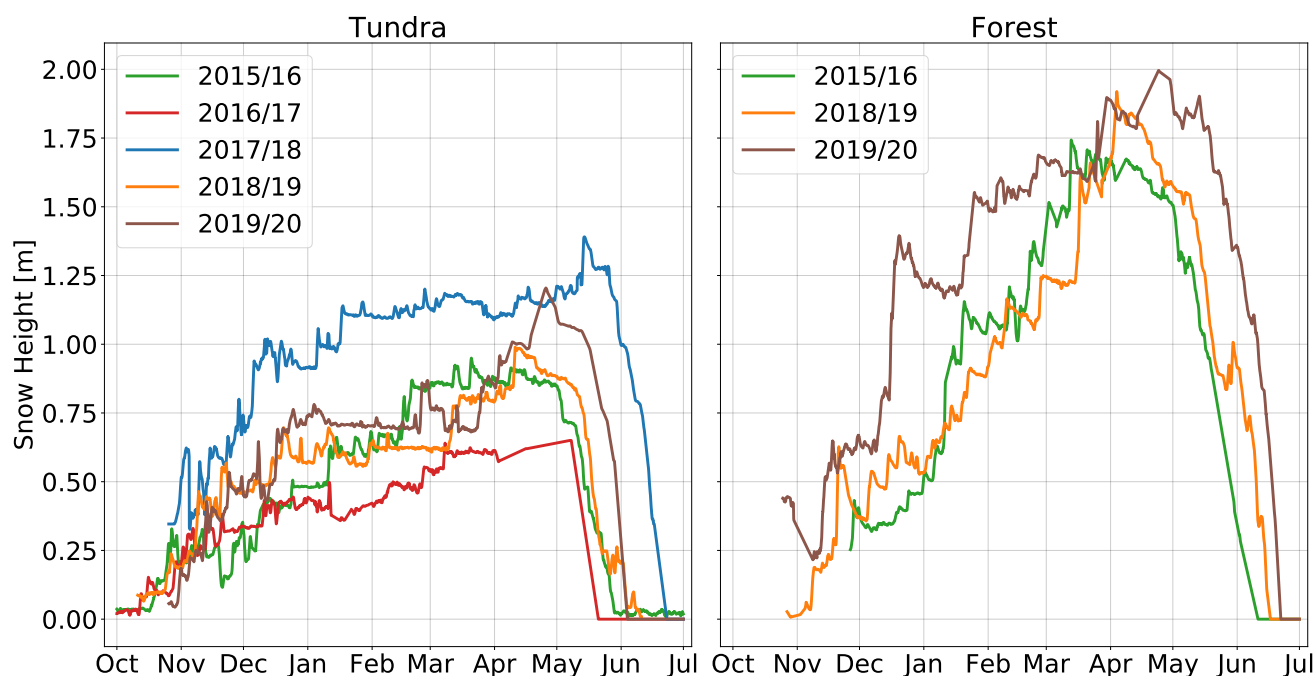

**Figure 4.** Comparison of the measured snow height of TUNDRA and FOREST for several years. When necessary, missing data were filled in with time-lapse camera observations of a graduated rod. Unfortunately, there was too much missing data from the winters 2016-17 and 2017-18 at FOREST, so those winters are not presented here.

all years. The melt-out date at TUNDRA was strongly correlated with maximum snow height, and on average, this occurred in early June. However, depending on the maximum snow height, the melt-out date could occur half a month earlier or later, as was observed in winters 2016–17 and 2019–20. As the maximum snow height at FOREST was much more similar between the years, the melt-out dates were also more consistent and took place around mid-June for all years.

220 Although the observations presented in Figure 4 are a good proxy for determining general snow heights at the sites, there is a high spatial variability. This variability is caused by the redistribution of snow by frequent high winds combined with differences in micro-topography and vegetation. For instance, on 12 April 2018, we sampled the snow height within a 100 m radius of TUNDRA and observed large variations in snow height. The heights varied between 50 cm and 210 cm, with a mean value of 109 cm. This is within 8 cm of the height measured by the automatic station that day (117 cm).



## 225 3.2.2 Stratigraphy

Differences in snow heights are reflected in the internal composition of the snow cover. Figure 5 shows simplified stratigraphies of representative samples from both TUNDRA and FOREST.

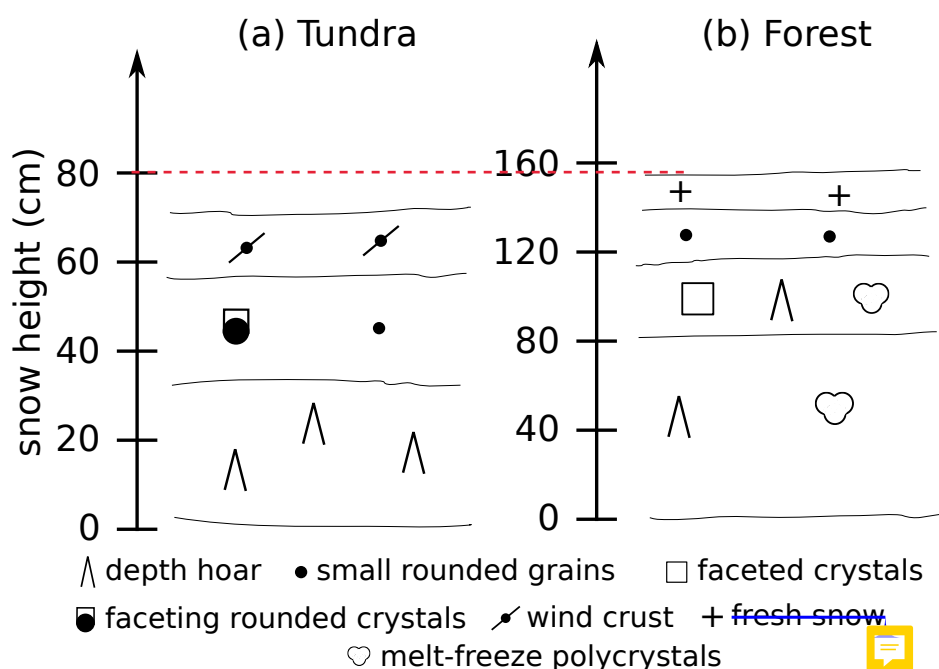

**Figure 5.** Simplified stratigraphies from February 2014 representing typical snow conditions at sites (a) TUNDRA (25 February) and (b) FOREST (24 February). Note that the y-scales are different for the two sites.

At TUNDRA, the depth hoar made up around half of the total depth. Just above the depth hoar, some layers of faceting or rounded faceted crystals were present, whereas the top of the snowpack usually consisted of a hard wind slab. The fraction of each layer type was highly variable. Furthermore, there were often more than three layers observed, and wind slabs alternating with layers of faceted crystals were fairly common.

The stratigraphy at FOREST was markedly different from that found at TUNDRA. While the depth hoar fraction was comparable to the one found at TUNDRA, melt-freeze forms were often present within these basal layers. On top of the depth



hoar layers, there were often layers of small, rounded crystals. While the uppermost layers at TUNDRA were usually made up  
 235 of a wind slab, fresh snow (precipitation particles) was often found in the top layer of the snowpack at FOREST, as seen in  
 Figure 5.

### 3.2.3 Density and Thermal Conductivity

On the left side of Figure 6, the density profiles of 29 snow pits that were dug in the months of January, February, and March  
 from the years 2012–2019 are shown, along with their means. They were all dug in the surrounding area of TUNDRA or  
 240 similar environments. The same is shown on the right side of Figure 6, but for 18 snow pits that were dug near FOREST or in  
 similar environments. In order to make the profiles comparable, the snow heights were normalized.

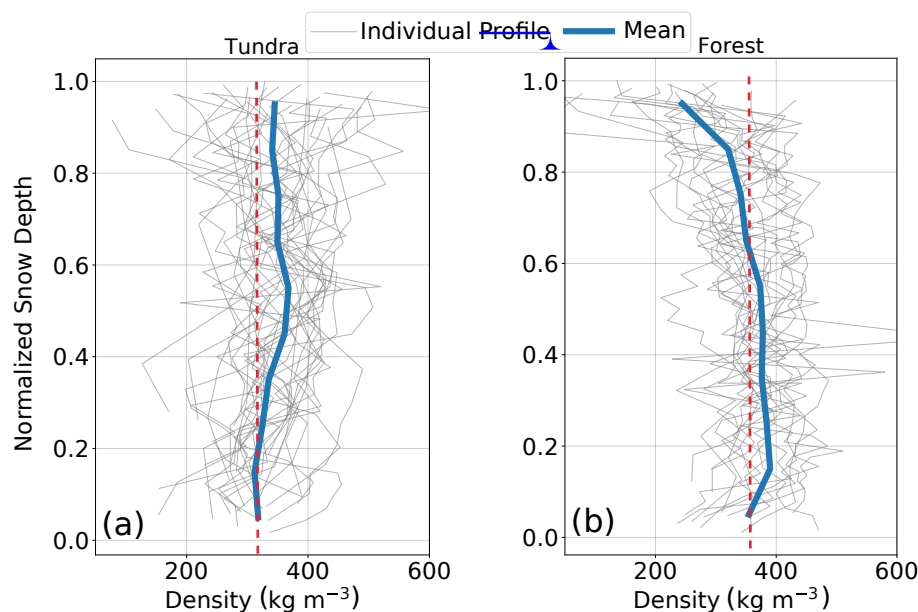

**Figure 6.** Snow density profiles from 29 snow pits in tundra environments and 18 snow pits in forested environments collected between January and March from the years 2012 to 2019. For better comparability, snow heights were normalized. The means of all profiles are also shown.



Due to the contrast in snow heights between the two sites, the vertical density profiles also showed significant differences. While mean snow density slightly increased with height at TUNDRA, there was a clear decrease in density for the upper 80% of the snowpack at FOREST (only the lowermost snow layer did not follow this general trend). At TUNDRA, the mean density at the bottom of the snowpack was around  $315 \text{ kg m}^{-3}$  and then rose to  $350 \text{ kg m}^{-3}$  in the middle and upper parts of the snowpack. At FOREST, snow in the basal layers had a mean density of around  $375 \text{ kg m}^{-3}$ , which decreased to less than  $250 \text{ kg m}^{-3}$  at the top. The scatter in the measured profiles was comparable at both sites, with extremes of  $100 \text{ kg m}^{-3}$  on either side of the mean.

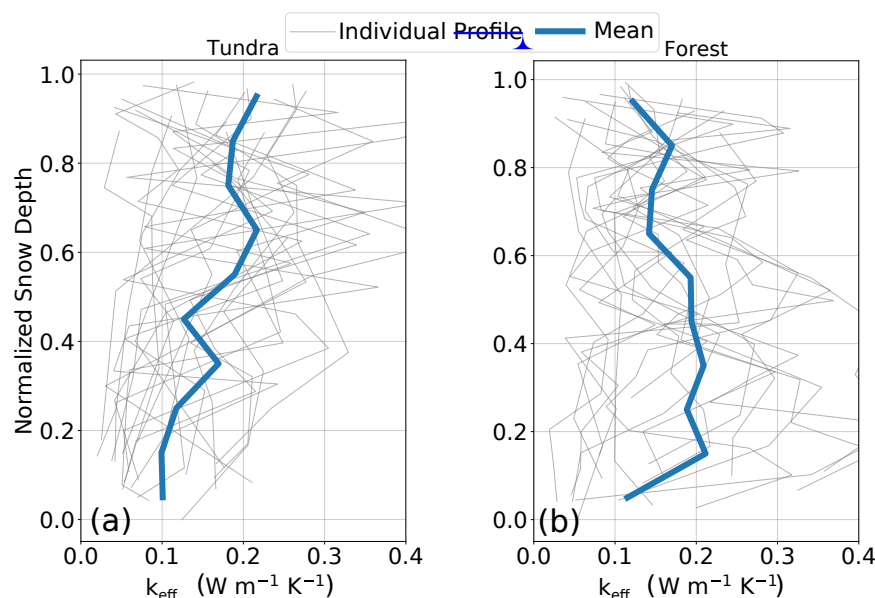

**Figure 7.** Same as Figure 6 but for snow thermal conductivity. Note that only data from 21 snow pits for TUNDRA and 17 for FOREST were used, as thermal conductivity measurements were not collected for every snow pit

The profiles of snow thermal conductivity in Figure 7 follow the same trend as the snow density in Figure 6, with  $k_{eff}$  increasing with height at TUNDRA and decreasing with height at FOREST. At TUNDRA,  $k_{eff}$  values increased from  $0.1 \text{ W m}^{-1} \text{ K}^{-1}$  in the depth hoar layers to slightly more than  $0.2 \text{ W m}^{-1} \text{ K}^{-1}$  in the wind slab. At FOREST, the thermal conductivity



generally decreased from  $0.2 \text{ W m}^{-1} \text{ K}^{-1}$  in the basal layers to almost  $0.1 \text{ W m}^{-1} \text{ K}^{-1}$  in the top layer. However, the lowermost snow layer at FOREST did exhibit very low thermal conductivity ( $\approx 0.1 \text{ W m}^{-1} \text{ K}^{-1}$ ), indicating a departure from the general trend of the profile. The scatter of the measured thermal conductivity profiles is more pronounced at both sites when compared to that observed for density profiles, with a 178% increase of the variance at TUNDRA and 214% at FOREST. This scatter is particularly large in the layer with the highest thermal conductivity (e.g. the top layer at TUNDRA and the near-bottom layer at FOREST), with values ranging from  $0.05 \text{ W m}^{-1} \text{ K}^{-1}$  to over  $0.4 \text{ W m}^{-1} \text{ K}^{-1}$ .

### 3.2.4 Soil and Snow Temperatures

Snow heights and thermal conductivity were quite different from one site to another and consequently, the same variation can be assumed for snow and ground temperature (Figure 8).

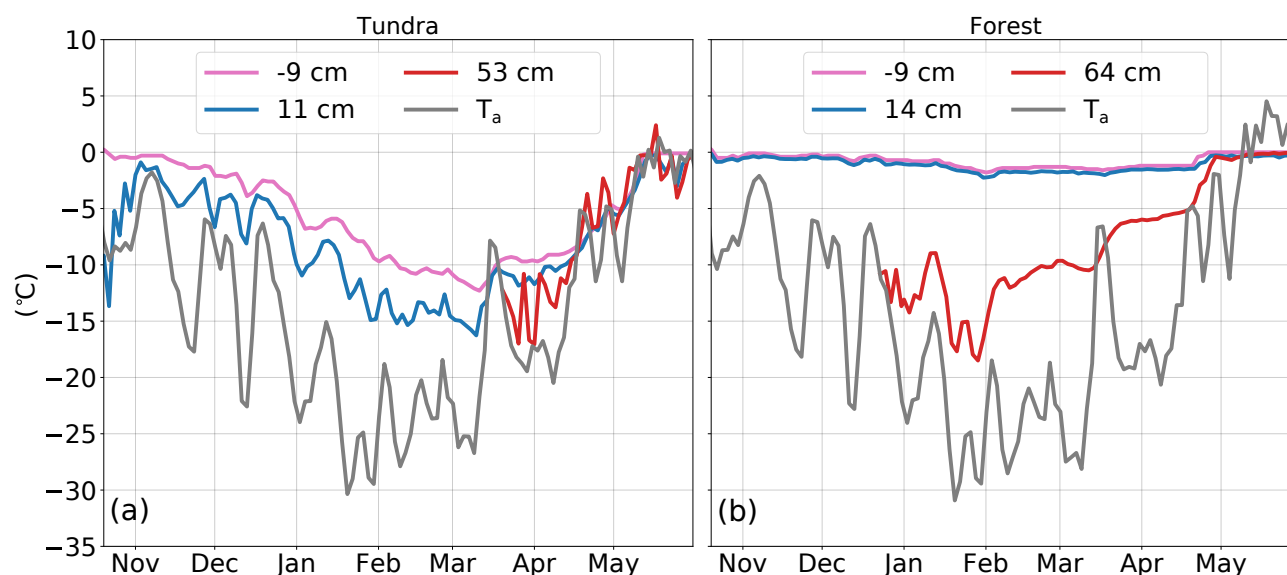

**Figure 8.** Snow (blue and red), ground (pink curve) and air temperatures (grey curve) at the (a) TUNDRA and (b) FOREST for winter 2018-19. Heights at which measurements were taken are relative to the surface of the ground. Air temperature  $T_a$  was measured at 2.3 m above ground. The values correspond to measurements collected once every two days.



As air temperatures and other meteorological forcings (Figure 2) only slightly varied between the two sites, differences between snow and ground temperatures likely arose from discrepancies in the snowpack properties. The most noticeable divergence occurred near the soil-snow interface. At FOREST, the ground remained unfrozen until January, and then dropped to its lowest value at slightly below  $-1^{\circ}\text{C}$ . The snow temperature at 14 cm very closely followed the ground temperature, but  
265 was  $1^{\circ}\text{C}$  colder. At TUNDRA, the ground at 9 cm depth froze as early as mid-November and then in March dropped to the lowest values of below  $-11^{\circ}\text{C}$ , about  $10^{\circ}\text{C}$  colder than at FOREST. At TUNDRA, the snow temperature at 11 cm was on average  $3^{\circ}\text{C}$  colder than the ground temperature. The temperatures higher up in the snowpack (53 cm for TUNDRA and 64 cm for FOREST) followed air temperature fluctuations more closely. At TUNDRA, the difference between air and top layer snow temperatures varied between 0 and  $5^{\circ}\text{C}$ . At FOREST, this difference reached up to  $10^{\circ}\text{C}$ , with an evident decoupling between  
270 air and top layer temperatures beginning in early February.

### 3.3 Modeling

#### 3.3.1 Snow Height

In Figure 9, the snow heights at TUNDRA and FOREST during winters 2018–19 and 2019–20 are compared to two different simulations, one using the default configuration of Crocus and one using the adjusted version of Crocus presented in section  
275 2.3.

At TUNDRA, the default version shows reasonable agreement with the observations. In winter 2018–19, snow height is underestimated by 15 to 20 cm during the accumulation period. In late April and May, the simulated melting occurs too early, leading to a snow disappearance date that is 12 days earlier than the observations. For winter 2019–20, there is better agreement between the default version of Crocus and the observations with a mean negative bias of 10 cm, leading to a modeled melt-out



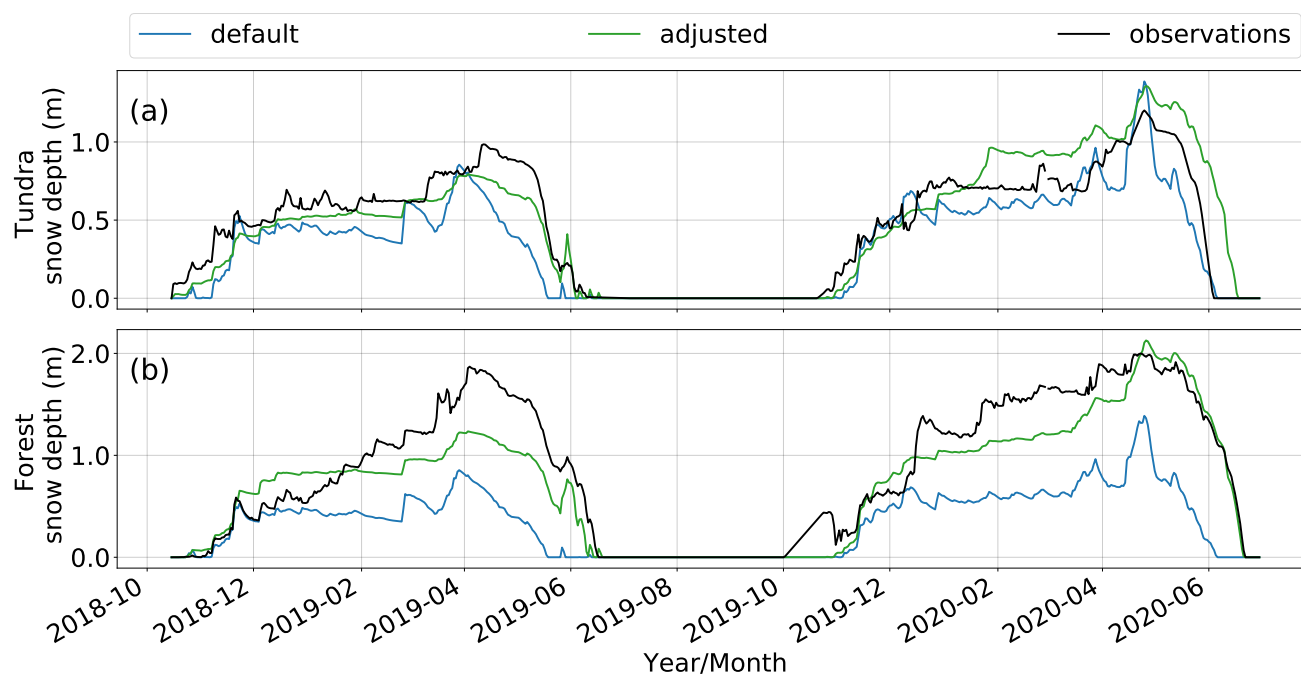

**Figure 9.** Evolution of simulated and observed snow heights during winters 2018-19 and 2019-20 (a) TUNDRA and (b) FOREST. Two different simulations are shown: the default version of Crocus and the adjusted version, in which modifications to the compaction and snowfall modules are activated at the two sites. At FOREST, a blowing snow module is implemented to account for snow transport by the wind.

280 date that is just two days later than the observed date. There is one exception during a precipitation event in late April in which the snow height is clearly overestimated by the model. Simulations with the adjusted version of Crocus for TUNDRA show an increased snow height of 10 to 20 cm compared to the default version. For winter 2019–20, this leads to a delayed melt-out that is 15 days later than the observed date. One striking difference between the two versions is that the snow height fluctuations are dampened in the adjusted version of Crocus. Particularly, there is much less compaction following precipitation events and

285 it is more in line with the observed snow height pattern.

Since the meteorological forcing is nearly the same at both sites, it is not surprising that the snow heights modeled by the default version of Crocus at FOREST are very similar to those at TUNDRA. As a result, the modeled snow heights of the default version are lower than the observed snow heights by a factor of 2. Thus, the simulated melt-out date is early by one



month for winter 2018–19 and by 16 days for winter 2019–20. The adjusted version of Crocus simulated the snow heights that  
290 are much closer to those observed. However, snow heights are still underestimated by between 10 cm and 70 cm. The melt-out  
date is better simulated, with a difference of 9 days in winter 2018–19 and 0 days in 2019–20.

One striking feature of all versions of the model is that simulated snow accumulation events do not always match with the  
observed accumulation events. This is most noticeable in February and March, 2019. In February, all simulations show an  
accumulation, while no change in snow height was observed at TUNDRA. The opposite happened in March, when an increase  
295 in snow height was observed at the site but no accumulation is reported in the simulation. This mismatch between observations  
and simulation is due to the transport of snow by wind.

### 3.3.2 Density

The mean observed density profiles (Figure 6) are compared to the default and adjusted model runs in Figure 10.

Again, the default version of Crocus produces practically the same results at both sites, considering the small differences  
300 between the two forcing files. The mean from the default version shows a steep decline in density with height, as is typically  
observed for alpine snow. At the bottom of the snowpack, the density reaches almost  $500 \text{ kg m}^{-3}$ , whereas the snow is very  
light at the top, with a minimum density of below  $90 \text{ kg m}^{-3}$ . At TUNDRA, the adjusted model fairly accurately simulated the  
density profile. It overestimates the density by  $\approx 50 \text{ kg m}^{-3}$  in the bottom 40% of the snowpack, while it underestimates the  
density by 40 to  $70 \text{ kg m}^{-3}$  in the upper 60%. However, whereas the mean absolute error of the default version is  $127 \text{ kg m}^{-3}$ ,  
305 it declines to  $38 \text{ kg m}^{-3}$  for the adjusted version. Moreover, the residual between the observations and the adjusted version is  
smaller than the variance of the observations.

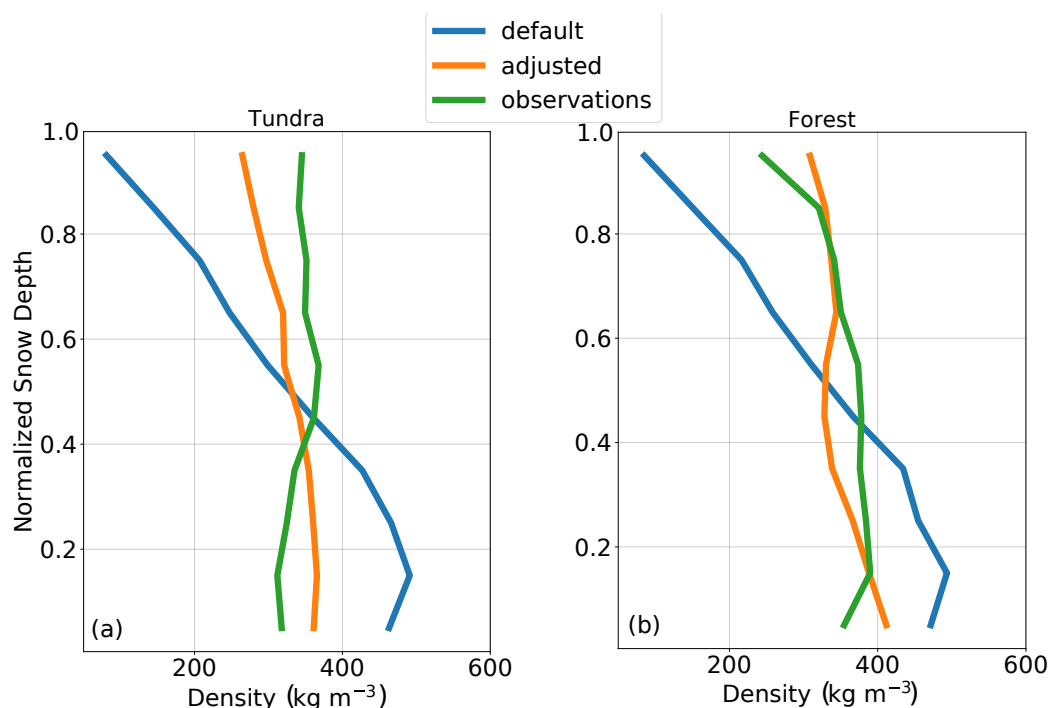

**Figure 10.** Comparison between observed mean snow density profiles from Figure 6 and the simulated density profiles from the default and adjusted versions of Crocus for (a) TUNDRA and (b) FOREST. The modeled mean profiles were obtained by averaging one snow profile per week between the months of January and March for both sites from 2017 to 2020.

At FOREST, the default version of Crocus performs better than at TUNDRA, as observations showed a decrease in density with height. However, the density at the bottom of the snowpack is still largely overestimated ( $\approx 100 \text{ kg m}^{-3}$ ) and even more so at the top ( $\approx 160 \text{ kg m}^{-3}$ ). Again, the adjusted version does reproduce the density profile significantly better than the default version. The mean absolute error decreases from  $87 \text{ kg m}^{-3}$  for the default version to  $30 \text{ kg m}^{-3}$  for the adjusted version. Similar to the profiles at TUNDRA, the variance of the observations is higher than the residual between the adjusted model and observation profile.



## 4 Discussion

### 4.1 Observations

315 We contrasted snow conditions at two sites located less than 1 km apart in the forest–tundra ecotone, each with very different  
vegetation characteristics (shrub tundra versus open forest). Meteorological conditions differed very slightly between the two  
sites (Figure 2). At TUNDRA, air temperatures were a bit colder in spring for some of the years we studied and incoming  
shortwave radiation was slightly higher than at FOREST. The impact of air temperature differences on snow cover was modest,  
as the largest deviations between the two sites were minor and confined to short periods. The difference in downwelling  
320 shortwave radiation can be explained by the location of FOREST further down the valley, as for low solar angles in mid-winter,  
topographic shading is more pronounced there. Again, this does not heavily impact the snowpack, as the albedo during this  
period is very high ( $\approx 0.85$ , see Lackner et al. (2022)). The high albedo means that most of the additional radiation at TUNDRA  
is reflected. The higher wind speeds at TUNDRA, however, have a considerable influence on the snowpack, leading to greater  
compaction and more fragmented crystals than at FOREST. The difference in wind speed between the two sites is most likely  
325 due to the lower surface roughness at TUNDRA, resulting from the shorter vegetation.

In addition to altered snow compaction at the surface, snow is also transported by the wind. During periods of high wind  
speeds ( $> 3 \text{ m s}^{-1}$ ), snow deposited on the surface is lifted up in the air and is typically transported several hundred meters  
away before settling back on the surface (Takeuchi, 1980). This phenomenon explains the large difference in snow height  
between the two sites, despite the likely similar amounts of total precipitation. As blowing snow events occur several times per  
330 week in the valley, snow is continuously transported from the upper parts of the valley (TUNDRA) to the lower part (FOREST).  
This leads to a gradual increase in snow height at FOREST. We see evidence that the taller vegetation at FOREST traps snow



early in the ~~season~~. Snow surveys that have been conducted at the very top of the valley revealed a very thin snowpack ( $\lesssim 40$  cm). The snow height at TUNDRA is more closely correlated with the precipitation rate, which is typically lower from January to March (see Figure 3). As a result, the maximum snow height is on average twice as high at FOREST than at TUNDRA.

335 The differences in stratigraphy and density are a direct result of the different snow heights at the two sites. At FOREST, where there is more snow, the bottom layers are more compacted by the weight of the overburden snow and are consequently denser. The thick snow cover insulates the soil more efficiently, maintaining warmer soil and creating a greater vertical gradient of snow temperatures throughout the winter (see Figure 11). These conditions favor the kinetic growth of snow crystals and the development of thick depth hoar layers (Marbouty, 1980). At TUNDRA, where the snow height is considerably lower, the overburden weight and therefore the compaction of the lower layers are reduced, leading to basal layers of lower density. Due to the reduced snow height and fairly similar snow thermal conductivity, soil freezes earlier in the winter. Thus, the vertical gradient of snow temperature is greater at TUNDRA than at FOREST in early winter. However, the gradient decreases when soil freezes (Figure 11), resulting in a comparable depth hoar fraction as at FOREST. At the top of the snowpack, wind speed shapes both the density and the stratigraphy. The lower wind speeds at FOREST lead to snow that is not as densely compacted  
340 at the top snow layers, which tends to preserve the shape of the snow crystals on the surface. This explains the observed lower density and higher abundance of precipitation particles. The opposite is true for TUNDRA, where wind speeds are higher, leading to denser top layers and precipitation particles that are rapidly fragmented and compacted into wind slabs.

Several studies have proposed a relationship between snow density and its thermal conductivity, often via a second-order polynomial (e.g. Sturm et al. (1997), Calonne et al. (2011), and Fourteau et al. (2021)). However, a key factor that is not  
350 included in these equations is the snow type. Here, we hypothesize that this is the reason for the mismatch between the observed profiles of thermal conductivity in Figure 7 and those of density in Figure 6. The thermal conductivity profile at

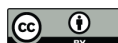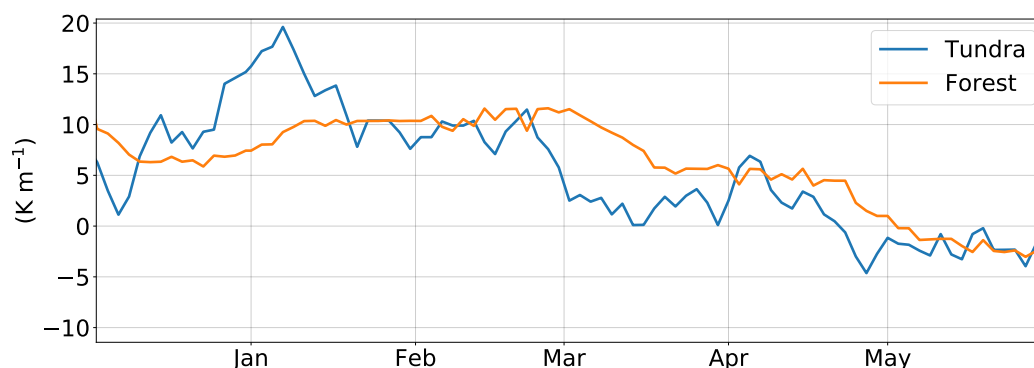

**Figure 11.** Temperature gradient at the base of the snowpack for winter 2017-18 at TUNDRA and FOREST. At TUNDRA, measurements were made at 11 cm and 21 cm while the measurement heights were 4 cm and 14 cm at FOREST. Note that the measurement interval was two days, thus the peak gradients are likely ~~much higher~~ than shown here.

TUNDRA shows a very clear trend of increasing values with height, while there is only a very modest increase in density with height. One should note however, that this could also be an artefact of the manual needle probe method, as the soft snow at the bottom of the snowpack often breaks when the needles are inserted. For FOREST, the decreasing trend of thermal conductivity  
 355 with height is more consistent with the density profile.

## 4.2 Simulations

The accurate simulation of Arctic snow is complex, as environmental factors are strikingly different compared to those in alpine environments, for which most of the sophisticated snow models have been developed (e.g. Brun et al. (1989) and Bartelt and Lehning (2002)). In recent studies, Arctic snow was simulated using Crocus and SNOWPACK snow models that included  
 360 adaptations to account for higher wind compaction and the stabilizing effect of vegetation (Barrere et al., 2017; Gouttevin et al., 2018; Royer et al., 2021b). With these modifications, the simulations of the density profiles were significantly improved and thus more realistic. The changes proposed in those studies are similar to those we have implemented in our study, but some differences should be highlighted. Barrere et al. (2017) increased only the maximum density related to the parametrization of



wind-induced snow compaction. Gouttevin et al. (2018) and Royer et al. (2021b) reduced the snow density in the vegetation,  
 365 similar to what we have done in our study. However, we also tried to account for the bending of shrubs and as such, snow  
 compaction was reduced for only 50% of canopy height, and not the full height. The latter two studies also implemented  
 different parametrizations for the density of fresh snow. While Gouttevin et al. (2018) based their parametrization on Antarctic  
 data from Groot Zwaaftink et al. (2013), Royer et al. (2021b) used different parameters in the formulation of Vionnet et al.  
 (2012) than those used here, namely they doubled the parameter  $c_{\rho_s}$ . Therefore, while there are clear similarities between the  
 370 various approaches, the exact parametrizations used differ, which raises the question of the degree to which the parametrizations  
 can be valid beyond their site of optimization.

The stabilizing influence of vegetation on the snow cover is not well documented. Ménard et al. (2014) observed and modeled  
 the bending of shrubs, showing that they do not just remain at the same height when being buried in snow, but rather bend  
 to some extent. This suggests that the snow cover is not stabilized over the full height of the vegetation, but rather on some  
 375 fraction of it. Belke-Brea et al. (2020) investigated allometric equations for the exposed vegetation fraction of shrubs at the  
 same site as in this study and explained deficiencies of the equation by a twofold structure of the shrubs, where the lower part  
 is more stable while the upper part is bent stronger. Thus, not taking the whole vegetation height as a zone where compaction  
 is reduced seems a reasonable choice, particularly for higher shrubs as at FOREST.

Sustained high wind speeds are common in the Arctic and are thus an important factor influencing the snowpack. First,  
 380 top snow layers are compacted by wind and including this process into the model significantly improved the results. The  
 second impact of strong winds is the transport of snow. This process is getting increased attention for snow simulations in  
 mountainous environments (Marsh et al., 2020; Vionnet et al., 2021). We argue that it is equally important for applications in  
 the Arctic environment. The simulated snow heights using the default version of Crocus differed from the observations by more



than a factor of 2. Thus, future studies that use distributed snow models should take snow transport into account. Combined  
385 with the impact of the snow height on the soil temperature (see section 3.2.4), the importance of wind-driven snow transport is  
apparent and has a crucial impact on permafrost studies.

Finally, we would like to emphasize that we did not set out to find the best set of coefficients to simulate the two study  
sites. By including some key processes that are specific to the Arctic, our aim was to demonstrate that it is possible to simulate  
vertical density profiles reasonably well. However, as the model did not perform as well at TUNDRA as it did at FOREST, our  
390 results suggest that there is no single set of parameters that is best suited for both environments. The reason may be that these  
coefficient-fitting schemes are just compensating for the lack of description of upward water vapor fluxes in snowpacks, and  
the solution may be to actually include them in models.

### 4.3 Water Vapor Fluxes

At TUNDRA, the snowpack showed a significant fraction of depth hoar, a snow type that solely originates under conditions  
395 with water vapor transport. Furthermore, the snow density increased towards the snow surface, whereas the opposite, a strongly  
decreasing pattern was simulated by Crocus, where compaction by overburden weight is the most important factor influencing  
the density. As our site receives a relatively large amount of precipitation, the findings show that water vapor transport is  
dominant over compaction even for thicker (up to 1 m) Arctic snowpacks. Domine et al. (2016b) and Domine et al. (2019),  
demonstrated this predominance for thinner Arctic snowpacks and thus, water vapor transport can be considered prevalent in  
400 all Arctic regions.





At FOREST, we found a depth hoar fraction similar to that at TUNDRA. While the density slightly decreases towards the surface, its gradient is still far inferior compared to simulations by Crocus. This leads to the conclusion that water vapor fluxes also play a significant role for ~~thick~~, moderately cold snowpacks, present at FOREST.

Together with Sturm and Benson (1997), who demonstrated the importance of depth hoar for thinner ( $<1$  m) snowpacks  
405 in forested subarctic regions, the results show that vapor fluxes have a critical impact on snowpack physics in the Arctic, the  
(thin snowpack) boreal forest and the forest-tundra ecotone with thick snowpacks, and therefore presumably in the boreal forest with thick snowpacks as well. Consequently, vapor fluxes cannot be neglected on the overwhelming majority of seasonal snowpacks.

## 5 Conclusions

410 We analyzed several years of snow survey data at two sites that were located less than 1 km apart in the forest–tundra ecotone. One site was covered with sparse forest (FOREST) and one was an Arctic tundra (TUNDRA). We compared the snow properties of the two sites in terms of snow height, stratigraphy, density, thermal conductivity and snow temperature. Additionally, we ran simulations with the snow model Crocus to explore model performance in both environments.

All ~~the~~ observed snow properties revealed marked differences between the two sites. Snow height was up to twice as high at  
415 FOREST than at TUNDRA, due to wind-induced snow transport. This strongly affected the temperatures at the bottom of the snowpack, as they were at times more than  $10^{\circ}\text{C}$  colder at TUNDRA than at FOREST. A ~~large~~ difference was also observed for the vertical density profiles. Snow density slightly increased with snow height at TUNDRA, indicating a profile that is typical of Arctic snow. In contrast, the density at FOREST decreased with height, which is more typical for alpine environments. In both cases, a substantial depth hoar layer occupied the lower portion of the snowpack.

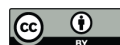

420 The Crocus model failed to reproduce the density profile of both sites. Non-optimized adjustments to better represent typical Arctic processes (increased fresh snow density, reduced compaction within the canopy and lateral transport of snow by the wind) have helped to improve the model outputs.

The significant amount of depth hoar and the Arctic-like density profile led to the conclusion that water vapor transport was the dominant metamorphic process at TUNDRA. At FOREST, the density gradient is towards slightly ~~lighter~~ layers at  
425 the top, indicating a role ~~in~~ overburden compaction. However, simulations indicate a significant role of water vapor transport, showing that even thick moderately cold snowpacks in the low-Arctic significantly differ from alpine-type snowpacks. Thus, after observing that water vapor transport is a crucial process in ~~the~~ thicker Arctic snowpacks and ~~the~~ thick, moderately cold snowpack ~~in~~ forested environments, we conclude that it is a critical process for the majority of seasonal snowpacks on Earth. Thus, the integration of water vapor fluxes in snow models, particularly in those coupled to climate models ~~is~~ a pressing issue.

430 *Code availability.* The source files of SURFEX code are provided at the Git repository ([http://git.umr-cnrm.fr/git/Surfex\\_Git2.git](http://git.umr-cnrm.fr/git/Surfex_Git2.git), last access: 15 November 2021) with several code management tools (history management, bug fixes, documentation, interface for technical support, etc.). Registration is required; a description of the procedure is described at [https://opensource.cnrm-game-meteo.fr/projects/snowtools/wiki/Procedure\\_for\\_new\\_users](https://opensource.cnrm-game-meteo.fr/projects/snowtools/wiki/Procedure_for_new_users) (last access: 15 January 2022).

*Data availability.* Data sets allowing the driving and testing of snow models at the TUNDRA and FOREST sites are being prepared and will  
435 be available soon.

*Author contributions.* GL, DN and FD designed research. GL, DN and FD deployed and maintained instruments. GL and FD performed the field work. GL analyzed data with inputs from DN and FD. GL set up the snow model Crocus with help from ML and MD. GL wrote the paper with inputs from DN and FD and comments from MD and ML.



*Competing interests.* Florent Domine and Marie Dumont are Editors for The Cryosphere.

440 *Acknowledgements.* This study was funded by Sentinel North, a Canada First Research Excellence Fund, under the theme 1 project titled,  
"Complex systems: structure, function and interrelationships in the North". The authors are grateful to Denis Sarrazin for technical support  
of the CEN weather stations and the community of Umiujaq for permission to conduct our research. This research has been supported by  
the Natural Sciences and Engineering Research Council of Canada (Discovery Grant), the French Polar Institute (IPEV) (grant no. 1042)  
and the Horizon 2020 program of the European Commission (INTAROS; grant no. 727890). CNRM/CEN is part of Labex OSUG@2020  
445 (ANR-10-LABX-0056).



## References

- Anderson, E. A.: A point energy and mass balance model of a snow cover, <https://repository.library.noaa.gov/view/noaa/6392>, 1976.
- Barrere, M., Domine, F., Decharme, B., Morin, S., Vionnet, V., and Lafaysse, M.: Evaluating the performance of coupled snow–soil models in SURFEXv8 to simulate the permafrost thermal regime at a high Arctic site, *Geoscientific Model Development*, 10, 3461–3479, <https://doi.org/10.5194/gmd-10-3461-2017>, 2017.
- 450 Bartelt, P. and Lehning, M.: A physical SNOWPACK model for the Swiss avalanche warning: Part I: numerical model, *Cold Regions Science and Technology*, 35, 123–145, [https://doi.org/10.1016/S0165-232X\(02\)00074-5](https://doi.org/10.1016/S0165-232X(02)00074-5), 2002.
- Bartlett, P. A., MacKay, M. D., and Verseghy, D. L.: Modified snow algorithms in the Canadian land surface scheme: Model runs and sensitivity analysis at three boreal forest stands, *Atmosphere-Ocean*, 44, 207–222, <https://doi.org/10.3137/ao.440301>, 2006.
- 455 Belke-Brea, M., Domine, F., Boudreau, S., Picard, G., Barrere, M., Arnaud, L., and Paradis, M.: New allometric equations for Arctic shrubs and their application for calculating the albedo of surfaces with snow and protruding branches, *Journal of Hydrometeorology*, 21, 1–49, <https://doi.org/10.1175/JHM-D-20-0012.1>, 2020.
- Brun, E., Martin, E., Simon, V., Gendre, C., and Coleou, C.: An Energy and mass model of snow cover suitable for operational avalanche forecasting, *Journal of Glaciology*, 35, 333–342, <https://doi.org/10.3189/S0022143000009254>, 1989.
- 460 Brun, E., Vionnet, V., Boone, A., Decharme, B., Peings, Y., Valette, R., Karbou, F., and Morin, S.: Simulation of Northern Eurasian Local Snow Depth, Mass, and Density Using a Detailed Snowpack Model and Meteorological Reanalyse, *Journal of Hydrometeorology*, 14, 21 955–21 964, <https://doi.org/10.1175/JHM-D-12-012.1>, 2013.
- Calonne, N., Flin, F., Morin, S., Lesaffre, B., du Roscoat, S. R., and Geindreau, C.: Numerical and experimental investigations of the effective thermal conductivity of snow, *Geophysical Research Letters*, 38, <https://doi.org/10.1029/2011GL049234>, 2011.
- 465 Cohen, J. and Rind, D.: The Effect of Snow Cover on the Climate, *Journal of Climate*, 4, 689–706, [https://doi.org/10.1175/1520-0442\(1991\)004<0689:TEOSCO>2.0.CO;2](https://doi.org/10.1175/1520-0442(1991)004<0689:TEOSCO>2.0.CO;2), 1991.
- Conger, S. and McClung, D.: Instruments and Methods Comparison of density cutters for snow profile observations, *Journal of Glaciology*, 55, 163–169, <https://doi.org/10.3189/002214309788609038>, 2009.
- Decharme, B., Boone, A., Delire, C., and Noilhan, J.: Local evaluation of the Interaction between Soil Biosphere Atmosphere soil multilayer diffusion scheme using four pedotransfer functions, *Journal of Geophysical Research: Atmospheres*, 116, <https://doi.org/10.1029/2011JD016002>, 2011.
- 470 Decharme, B., Brun, E., Boone, A., Delire, C., Le Moigne, P., and Morin, S.: Impacts of snow and organic soils parameterization on northern Eurasian soil temperature profiles simulated by the ISBA land surface model, *The Cryosphere*, 10, 853–877, <https://doi.org/10.5194/tc-10-853-2016>, 2016.
- 475 Domine, F., Barrere, M., Sarrazin, D., Morin, S., and Arnaud, L.: Automatic monitoring of the effective thermal conductivity of snow in a low-Arctic shrub tundra, *The Cryosphere*, 9, 1265–1276, <https://doi.org/10.5194/tc-9-1265-2015>, 2015.
- Domine, F., Barrere, M., and Morin, S.: The growth of shrubs on high Arctic tundra at Bylot Island: impact on snow physical properties and permafrost thermal regime, *Biogeosciences*, 13, 6471–6486, <https://doi.org/10.5194/bg-13-6471-2016>, 2016a.
- Domine, F., Barrere, M., and Sarrazin, D.: Seasonal evolution of the effective thermal conductivity of the snow and the soil in high Arctic herb tundra at Bylot Island, Canada, *The Cryosphere*, 10, 2573–2588, <https://doi.org/10.5194/tc-10-2573-2016>, 2016b.
- 480

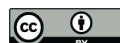

- Domine, F., Picard, G., Morin, S., Barrere, M., Madore, J.-B., and Langlois, A.: Major Issues in Simulating Some Arctic Snowpack Properties Using Current Detailed Snow Physics Models: Consequences for the Thermal Regime and Water Budget of Permafrost, *Journal of Advances in Modeling Earth Systems*, 11, 34–44, <https://doi.org/10.1029/2018MS001445>, 2019.
- Essery, R. and Pomeroy, J.: Vegetation and Topographic Control of Wind-Blown Snow Distributions in Distributed and  
 485 Aggregated Simulations for an Arctic Tundra Basin, *Journal of Hydrometeorology*, 5, 735, [https://doi.org/10.1175/1525-7541\(2004\)005<0735:VATCOW>2.0.CO;2](https://doi.org/10.1175/1525-7541(2004)005<0735:VATCOW>2.0.CO;2), 2004.
- Fourteau, K., Domine, F., and Hagenmuller, P.: Impact of water vapor diffusion and latent heat on the effective thermal conductivity of snow, *The Cryosphere*, 15, 2739–2755, <https://doi.org/10.5194/tc-15-2739-2021>, 2021.
- Gagnon, M., Domine, F., and Boudreau, S.: The carbon sink due to shrub growth on Arctic tundra: a case study in a carbon-poor soil in  
 490 eastern Canada, *Environ. Res. Commun.*, 1, 091 001, <https://doi.org/10.1088/2515-7620/ab3cdd>, 2019.
- Gordon, M., Simon, K., and Taylor, P. A.: On snow depth predictions with the Canadian land surface scheme including a parametrization of blowing snow sublimation, *Atmosphere-Ocean*, 44, 239–255, <https://doi.org/10.3137/ao.440303>, 2006.
- Gouttevin, I., Langer, M., Löwe, H., Boike, J., Proksch, M., and Schneebeli, M.: Observation and modelling of snow at a polygonal tundra permafrost site: spatial variability and thermal implications, *The Cryosphere*, 12, 3693–3717, <https://doi.org/10.5194/tc-12-3693-2018>,  
 495 <https://tc.copernicus.org/articles/12/3693/2018/>, 2018.
- Groisman, P. Y. and Easterling, D. R.: Variability and Trends of Total Precipitation and Snowfall over the United States and Canada, *Journal of Climate*, 7, 184 – 205, [https://doi.org/10.1175/1520-0442\(1994\)007<0184:VATOTP>2.0.CO;2](https://doi.org/10.1175/1520-0442(1994)007<0184:VATOTP>2.0.CO;2), 1994.
- Groot Zwaartink, C. D., Cagnati, A., Crepaz, A., Fierz, C., Macelloni, G., Valt, M., and Lehning, M.: Event-driven deposition of snow on the Antarctic Plateau: analyzing field measurements with SNOWPACK, *The Cryosphere*, 7, 333–347, <https://doi.org/10.5194/tc-7-333-2013>,  
 500 2013.
- Hersbach, H., Bell, B., Berrisford, P., Hirahara, S., Horányi, A., Muñoz-Sabater, J., Nicolas, J., Peubey, C., Radu, R., Schepers, D., Simmons, A., Soci, C., Abdalla, S., Abellan, X., Balsamo, G., Bechtold, P., Biavati, G., Bidlot, J., Bonavita, M., De Chiara, G., Dahlgren, P., Dee, D., Diamantakis, M., Dragani, R., Flemming, J., Forbes, R., Fuentes, M., Geer, A., Haimberger, L., Healy, S., Hogan, R. J., Hólm, E., Janisková, M., Keeley, S., Laloyaux, P., Lopez, P., Lupu, C., Radnoti, G., de Rosnay, P., Rozum, I., Vamborg, F., Vil-  
 505 laume, S., and Thépaut, J.-N.: The ERA5 global reanalysis, *Quarterly Journal of the Royal Meteorological Society*, 146, 1999–2049, <https://doi.org/10.1002/qj.3803>, <https://rmets.onlinelibrary.wiley.com/doi/abs/10.1002/qj.3803>, 2020.
- Ju, J. and Masek, J. G.: The vegetation greenness trend in Canada and US Alaska from 1984–2012 Landsat data, *Remote Sensing of Environment*, 176, 1–16, <https://doi.org/https://doi.org/10.1016/j.rse.2016.01.001>, 2016.
- Kochendorfer, J., Nitu, R., Wolff, M., Mekis, E., Rasmussen, R., Baker, B., Earle, M. E., Reverdin, A., Wong, K., Smith, C. D., Yang, D.,  
 510 Roulet, Y.-A., Buisan, S., Laine, T., Lee, G., Aceituno, J. L. C., Alastrué, J., Isaksen, K., Meyers, T., Brækkan, R., Landolt, S., Jachcik, A., and Poikonen, A.: Analysis of single-Alter-shielded and unshielded measurements of mixed and solid precipitation from WMO-SPICE, *Hydrology and Earth System Sciences*, 21, 3525–3542, <https://doi.org/10.5194/hess-21-3525-2017>, 2017.
- Lackner, G., Nadeau, D. F., Domine, F., Parent, A.-C., Leonardini, G., Boone, A., Anctil, F., and Fortin, V.: The effect of soil on the summertime surface energy budget of a humid subarctic tundra in northern Quebec, Canada, *Journal of Hydrometeorology*, 22, 2547–  
 515 2564, <https://doi.org/10.1175/JHM-D-20-0243.1>, 2021.
- Lackner, G., Domine, F., Nadeau, D. F., Parent, A.-C., Anctil, F., Lafaysse, M., and Dumont, M.: On the energy budget of a low-Arctic snowpack, *The Cryosphere*, 16, 127–142, <https://doi.org/10.5194/tc-16-127-2022>, 2022.



- Lafaysse, M., Cluzet, B., Dumont, M., Lejeune, Y., Vionnet, V., and Morin, S.: A multiphysical ensemble system of numerical snow modelling, *The Cryosphere*, 11, 1173–1198, <https://doi.org/10.5194/tc-11-1173-2017>, 2017.
- 520 Lehning, M., Bartelt, P., Brown, B., and Fierz, C.: A physical SNOWPACK model for the Swiss avalanche warning: Part III: meteorological forcing, thin layer formation and evaluation, *Cold Regions Science and Technology*, 35, 169–184, [https://doi.org/10.1016/S0165-232X\(02\)00072-1](https://doi.org/10.1016/S0165-232X(02)00072-1), 2002a.
- Lehning, M., Bartelt, P., Brown, B., Fierz, C., and Satyawali, P.: A physical SNOWPACK model for the Swiss avalanche warning: Part II. Snow microstructure, *Cold Regions Science and Technology*, 35, 147–167, [https://doi.org/10.1016/S0165-232X\(02\)00073-3](https://doi.org/10.1016/S0165-232X(02)00073-3), 2002b.
- 525 Lemieux, J.-M., Fortier, R., Murray, R., Dagenais, S., Cochand, M., Delottier, H., Therrien, R., Molson, J., Pryet, A., and Parhizkar, M.: Groundwater dynamics within a watershed in the discontinuous permafrost zone near Umiujaq (Nunavik, Canada), *Hydrogeology Journal*, 28, <https://doi.org/10.1007/s10040-020-02110-4>, 2020.
- Li, L. and Pomeroy, J. W.: Probability of occurrence of blowing snow, *Journal of Geophysical Research: Atmospheres*, 102, 21 955–21 964, <https://doi.org/https://doi.org/10.1029/97JD01522>, 1997.
- 530 Marbouty, D.: An experimental study of temperature-gradient metamorphism, *Journal of Glaciology*, 26, 303–312, <https://doi.org/10.3189/S0022143000010844>, 1980.
- Marsh, C. B., Pomeroy, J. W., Spiteri, R. J., and Wheeler, H. S.: A finite volume blowing snow model for use with variable resolution meshes, *Water Resources Research*, 56, e2019WR025 307, <https://doi.org/10.1029/2019WR025307>, e2019WR025307 2019WR025307, 2020.
- Meredith, M., Sommerkorn, M., Cassotta, S., Derksen, C., Ekaykin, A., Hollowed, A., Kofinas, G., Mackintosh, A., Melbourne-Thomas, J., Muelbert, M., Ottersen, G., Pritchard, H., and Schuur, E.: Polar Regions. In: IPCC Special Report on the Ocean and Cryosphere in a Changing Climate [H.-O. Pörtner, D.C. Roberts, V. Masson-Delmotte, P. Zhai, M. Tignor, E. Poloczanska, K. Mintenbeck, A. Alegría, M. Nicolai, A. Okem, J. Petzold, B. Rama, N.M. Weyer (eds.)], <https://www.ipcc.ch/srocc/>, 2019.
- Morin, S., Domine, F., Arnaud, L., and Picard, G.: In-situ monitoring of the time evolution of the effective thermal conductivity of snow, *Cold Regions Science and Technology*, 64, 73–80, <https://doi.org/10.1016/j.coldregions.2010.02.008>, 2010.
- 540 Morin, S., Domine, F., Dufour, A., Lejeune, Y., Lesaffre, B., Willemet, J.-M., Carmagnola, C., and Jacobi, H.-W.: Measurements and modeling of the vertical profile of specific surface area of an alpine snowpack, *Advances in Water Resources*, 55, 111–120, <https://doi.org/10.1016/j.advwatres.2012.01.010>, snow–Atmosphere Interactions and Hydrological Consequences, 2013.
- Myers-Smith, I. and Hik, D.: Shrub canopies influence soil temperature but no nutrient dynamics: An experimental test of tundra snow-shrub interactions, *Ecology and Evolution*, 3, 3683–700, <https://doi.org/10.1002/ece3.710>, 2013.
- 545 Ménard, C. B., Essery, R., Pomeroy, J., Marsh, P., and Clark, D. B.: A shrub bending model to calculate the albedo of shrub-tundra, *Hydrological Processes*, 28, 341–351, <https://doi.org/10.1002/hyp.9582>, 2014.
- Noilhan, J. and Planton, S.: A simple parameterization of land surface processes for meteorological models, *Monthly Weather Review*, 117, 536–549, [https://doi.org/10.1175/1520-0493\(1989\)117<0536:ASPOLS>2.0.CO;2](https://doi.org/10.1175/1520-0493(1989)117<0536:ASPOLS>2.0.CO;2), 1989.
- Oreiller, M., Nadeau, D. F., Minville, M., and Rousseau, A. N.: Modelling snow water equivalent and spring runoff in a boreal watershed, James Bay, Canada, *Hydrological Processes*, 28, 5991–6005, <https://doi.org/10.1002/hyp.10091>, 2014.
- Payette, S., Fortin, M.-J., and Gamache, I.: The Subarctic forest–tundra: The structure of a biome in a changing climate, *BioScience*, 51, 709–718, [https://doi.org/10.1641/0006-3568\(2001\)051\[0709:TSFTTS\]2.0.CO;2](https://doi.org/10.1641/0006-3568(2001)051[0709:TSFTTS]2.0.CO;2), 2001.
- Roy-Léveillé, P., Burn, C. R., and McDonald, I. D.: Vegetation-Permafrost Relations within the Forest-Tundra Ecotone near Old Crow, Northern Yukon, Canada, *Permafrost and Periglacial Processes*, 25, 127–135, <https://doi.org/https://doi.org/10.1002/ppp.1805>, 2014.



- 555 Royer, A., Domine, F., Roy, A., Langlois, A., Marchand, N., and Davesne, G.: New northern snowpack classification linked to vegetation cover on a latitudinal mega-transect across northeastern Canada, *Écoscience*, 0, 1–18, <https://doi.org/10.1080/11956860.2021.1898775>, <https://doi.org/10.1080/11956860.2021.1898775>, 2021a.
- Royer, A., Picard, G., Vargel, C., Langlois, A., Gouttevin, I., and Dumont, M.: Improved Simulation of Arctic Circumpolar Land Area Snow Properties and Soil Temperatures, *Frontiers in Earth Science*, 9, 515, <https://doi.org/10.3389/feart.2021.685140>, 2021b.
- 560 Schmucki, E., Marty, C., Fierz, C., and Lehning, M.: Evaluation of modelled snow depth and snow water equivalent at three contrasting sites in Switzerland using SNOWPACK simulations driven by different meteorological data input, *Cold Regions Science and Technology*, 99, 27–37, <https://doi.org/10.1016/j.coldregions.2013.12.004>, 2014.
- Sturm, M. and Benson, C. S.: Vapor transport, grain growth and depth-hoar development in the subarctic snow, *Journal of Glaciology*, 43, 42–59, <https://doi.org/10.3189/S0022143000002793>, 1997.
- 565 Sturm, M., Holmgren, J., and Liston, G. E.: A seasonal snow cover classification system for local to global applications, *Journal of Climate*, 8, 1261 – 1283, [https://doi.org/10.1175/1520-0442\(1995\)008<1261:ASSCCS>2.0.CO;2](https://doi.org/10.1175/1520-0442(1995)008<1261:ASSCCS>2.0.CO;2), 1995.
- Sturm, M., Holmgren, J., König, M., and Morris, K.: The thermal conductivity of seasonal snow, *Journal of Glaciology*, 43, 26–41, <https://doi.org/10.3189/S0022143000002781>, 1997.
- Takeuchi, M.: Vertical profile and Horizontal Increase of Drift-Snow Transport, *Journal of Glaciology*, 26, 481–492, <https://doi.org/10.3189/S0022143000010996>, 1980.
- 570 Vionnet, V., Brun, E., Morin, S., Boone, A., Faroux, S., Le Moigne, P., Martin, E., and Willemet, J.-M.: The detailed snowpack scheme Crocus and its implementation in SURFEX v7.2, *Geoscientific Model Development*, 5, 773–791, <https://doi.org/10.5194/gmd-5-773-2012>, 2012.
- Vionnet, V., Marsh, C. B., Menounos, B., Gascoin, S., Wayand, N. E., Shea, J., Mukherjee, K., and Pomeroy, J. W.: Multi-scale snowdrift-permitting modelling of mountain snowpack, *The Cryosphere*, 15, 743–769, <https://doi.org/10.5194/tc-15-743-2021>, 2021.
